# Supplementary material for: Potential Anti-SARS-CoV-2 Therapeutics That Target the Post-Entry Stages of the Viral Life Cycle: A Comprehensive Review
Source: Viruses. 2020 Sep 26;12(10):1092. doi: 10.3390/v12101092 (PMC7600245; doi:10.3390/v12101092)
Supplement: Supplementary file 1 [file viruses-12-01092-s001.pdf]

# **Potential Anti-SARS-CoV-2 Therapeutics that Target the Post-Entry Stages of the Viral Life Cycle: A Comprehensive Review**

Rami A. Al-Horani<sup>1\*</sup> and Srabani Kar<sup>1</sup>

*<sup>1</sup>Division of Basic Pharmaceutical Sciences, College of Pharmacy, Xavier University of Louisiana, New Orleans LA 70125, [ralhoran@xula.edu](mailto:ralhoran@xula.edu)*

\* Address for correspondence: Dr. Rami A. Al-Horani, 1 Drexel Drive, College of Pharmacy, New Orleans, LA 70125-1089. Phone: (504) 520-7603, Fax: (504) 520-7954, Email: [ralhoran@xula.edu](mailto:ralhoran@xula.edu)

## Supplementary Figures

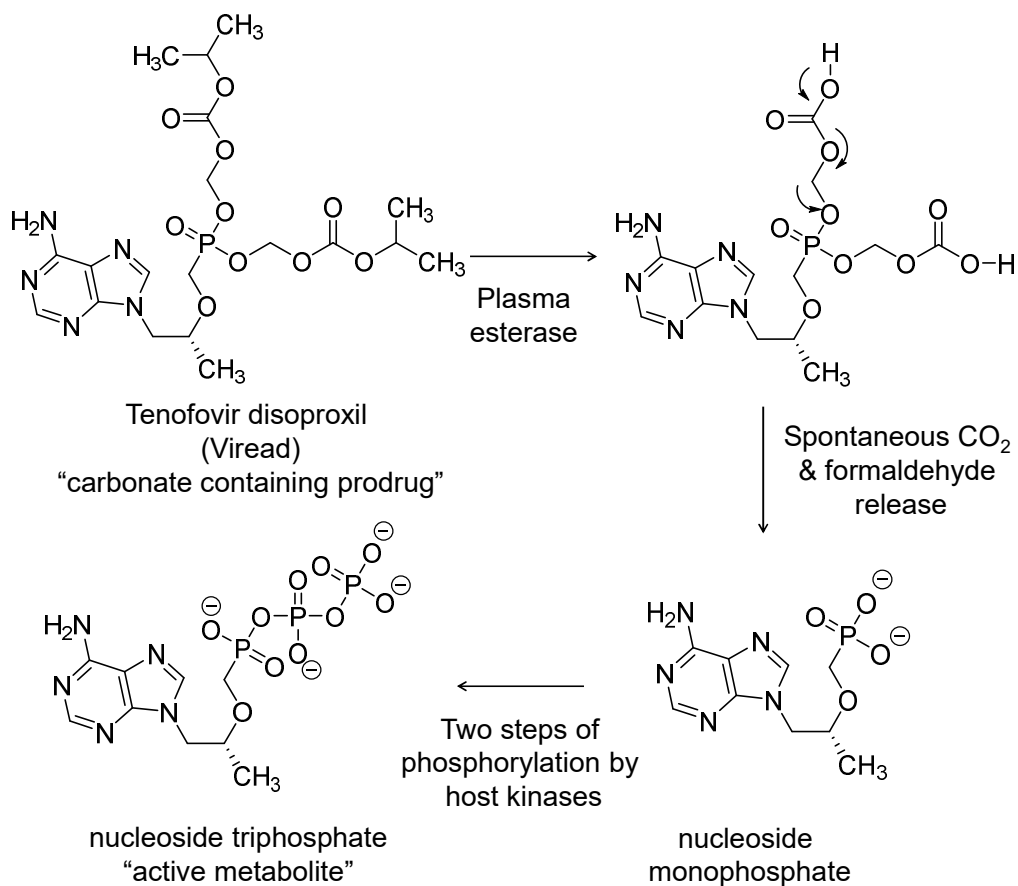

**Figure S1.** The chemical structure of tenofovir disoproxil and schematic representation of its metabolic bioactivation. Tenofovir is acyclic nucleotide derivative. It is also a prodrug. The corresponding triphosphate form is the active form and the inhibitor of the viral polymerase.

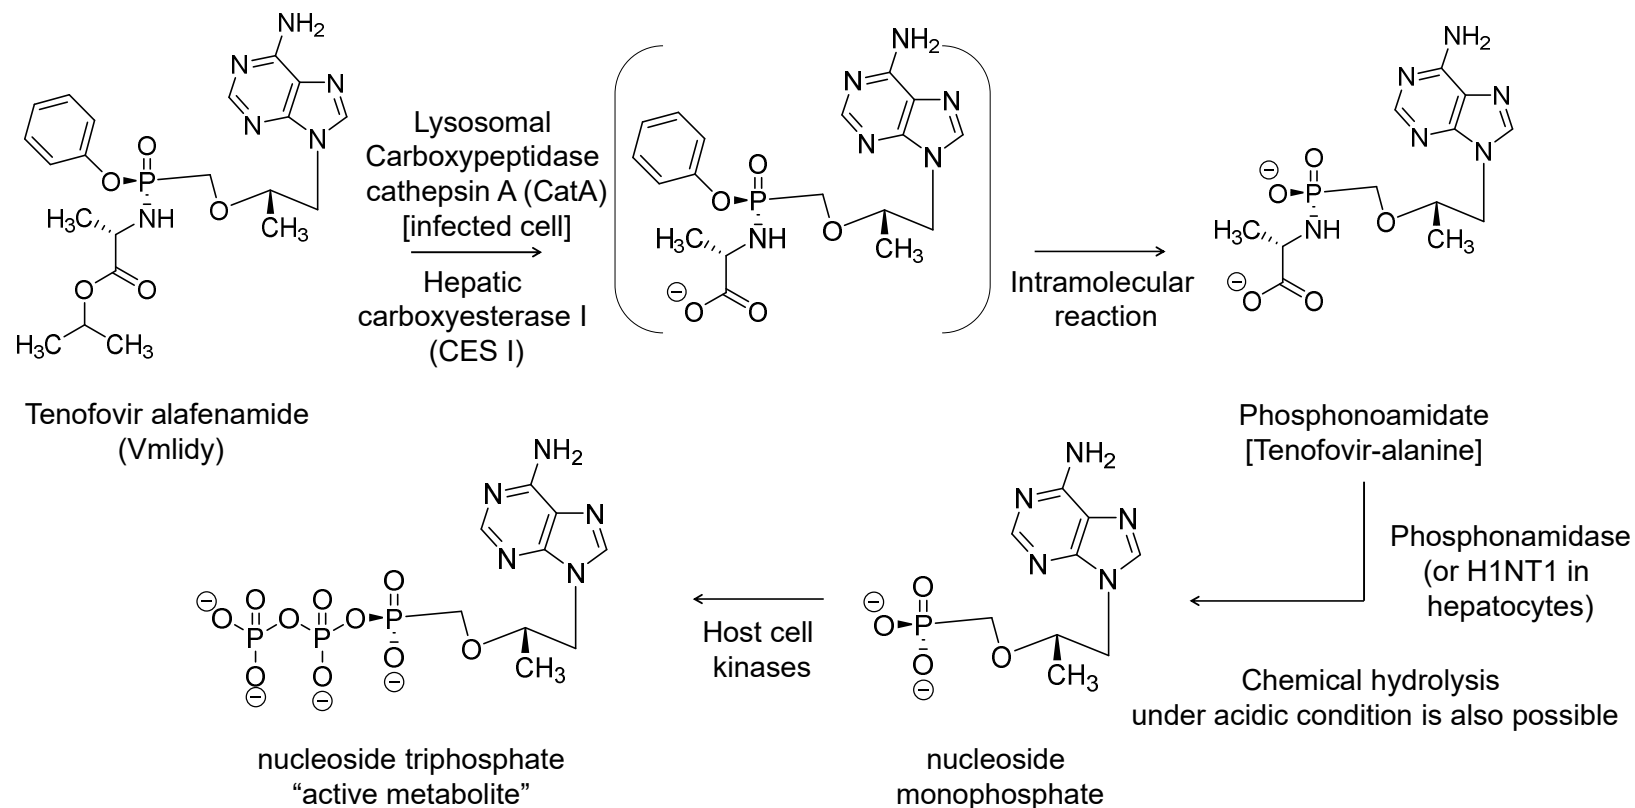

**Figure S2.** The chemical structure of tenofovir alafenamide and schematic representation of its metabolic bioactivation. Tenofovir is acyclic nucleotide derivative. It is also a prodrug that is more selectively activated in infected cells. The corresponding triphosphate form is the active form and the inhibitor of the viral polymerase.

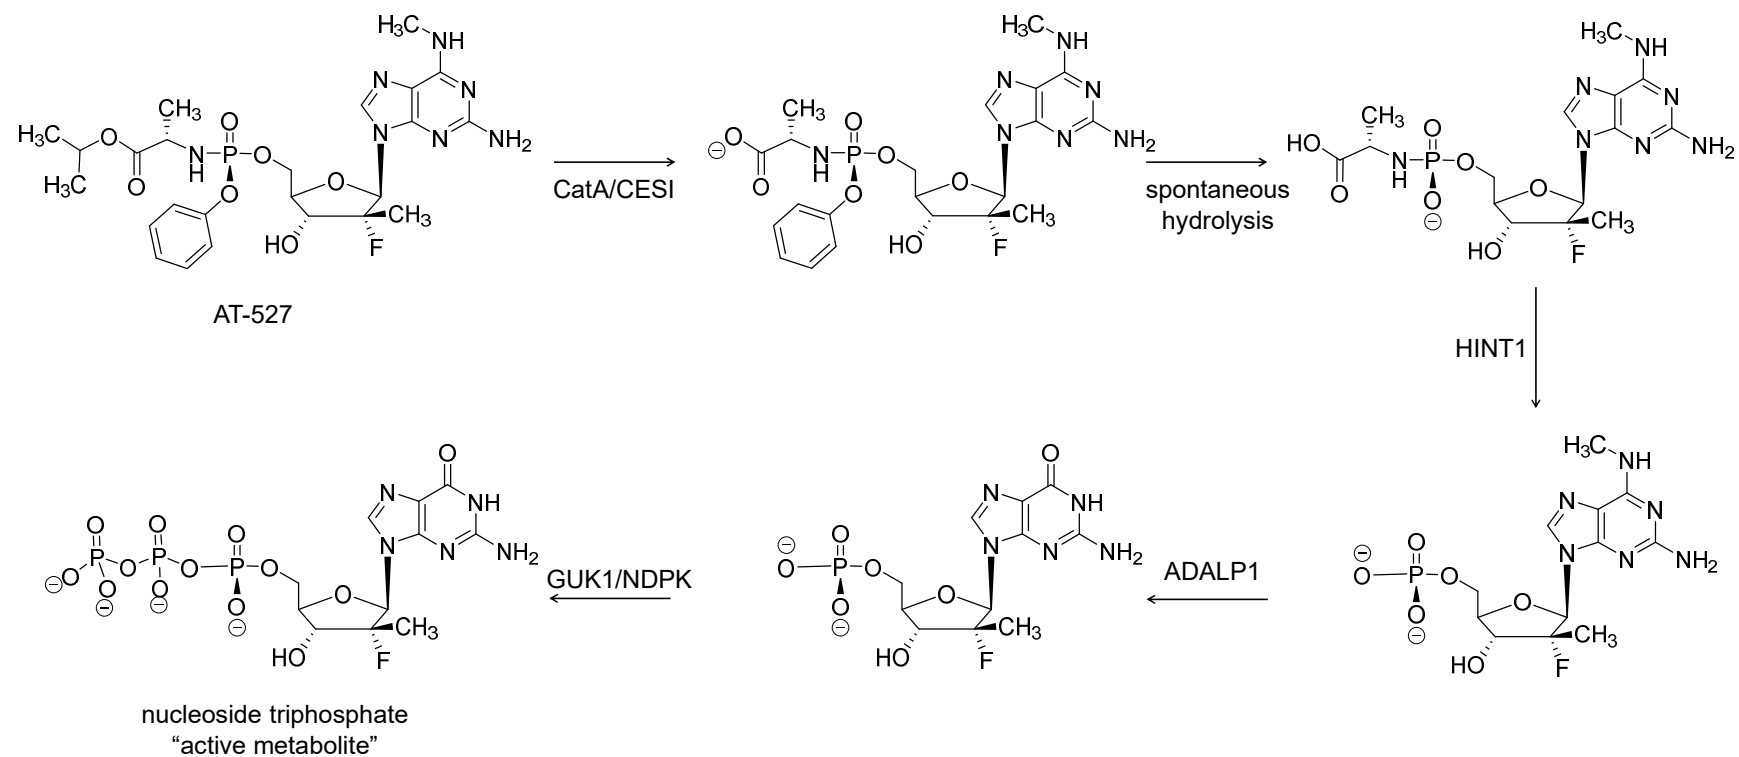

**Figure S3.** The chemical structure of AT-527 and schematic representation of its metabolic bioactivation. The corresponding triphosphate form is the active form and the inhibitor of the viral RNA polymerase.

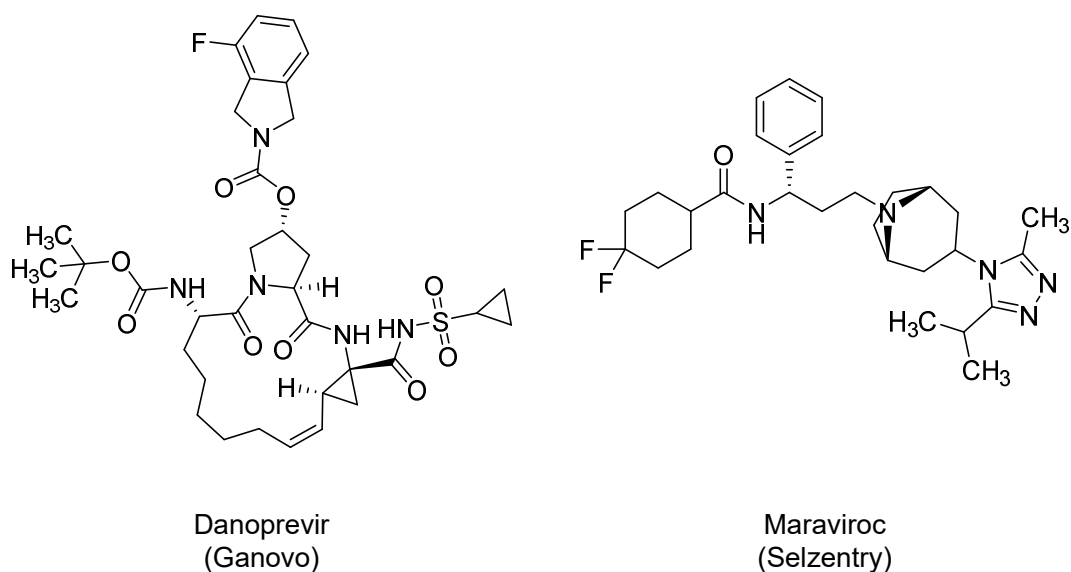

**Figure S4.** The chemical structure of danoprevir and maraviroc. The former is macrocyclic peptidomimetic antiviral drug. It is inhibitor of NS3/4A HCV protease, an important processing enzyme complex. The latter is azabicyclic molecule that exhibits antiretroviral activity by blocking the interaction between HIV-1 gp120 and CCR5 on human CD4-presenting cells, that is necessary for HIV-1 to enter cells. It was also shown that maraviroc may potentially act as a potential inhibitor of M<sup>pro</sup>.

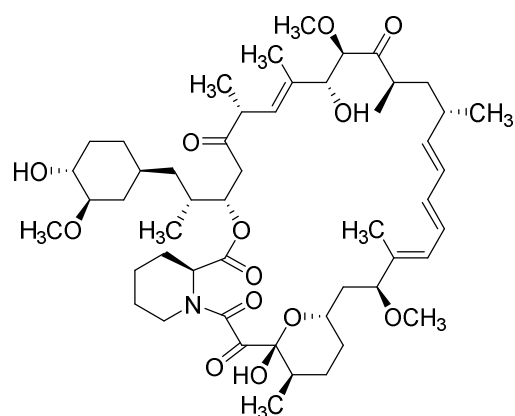

Sirolimus  
(Rapamune)

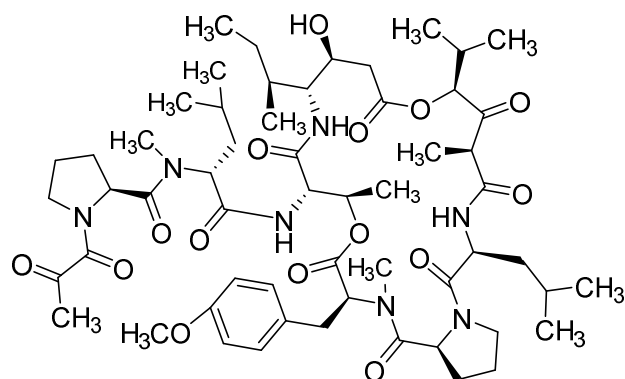

Plitidepsin  
(Aplidin)

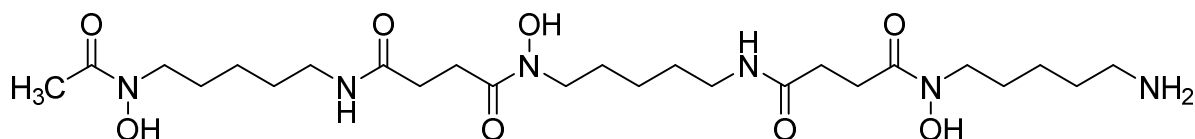

Deferoxamine  
(Desferal)

**Figure S5.** The chemical structures of three natural products that are currently being tested against COVID-19. Sirolimus is an immunosuppressive agent and mTOR pathway inhibitor. Plitidepsin is targeting eukaryotic translation elongation factor 1 alpha 1. Deferoxamine is antiviral and anti-inflammatory agent.

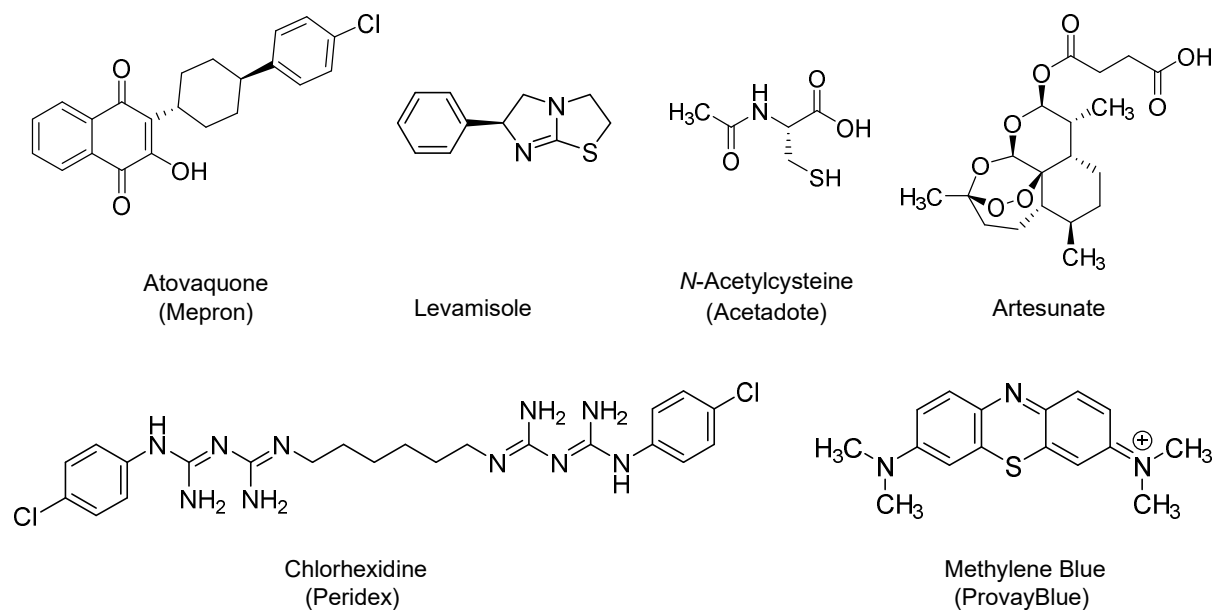

**Figure S6.** The chemical structures of various agents with potential antiviral activity attributed to various mechanisms. The list includes antimalarial drugs (atovaquone and artesunate), anti-inflammatory drug (levamisole), mucolytic agent (*N*-acetylcysteine), broad-spectrum antimicrobial agent (chlorhexidine), and a drug to treat methemoglobinemia (methylene blue).
